# Supplementary material for: Open system massive synthesis of narrow-band blue and green fluorescent graphene quantum dots and their application in water sensing
Source: Royal Society of Chemistry journal article supplement (doi:10.1039/d4tc00983e), 2024-01-01
Supplement: d4tc00983e1.pdf [file d4tc00983e1.pdf]

## **Electronic Supplementary Information**

*Journal of Materials Chemistry C*

### **Open system massive synthesis of narrow-band blue and green fluorescent graphene quantum dots and their application to water sensing**

Yukino Ochi, Ayano Otani, Rika Katakami, Akihiro Ogura, Ken-ichi Takao, Yoshiki Iso\*  
and Tetsuhiko Isobe\*

*Department of Applied Chemistry, Faculty of Science and Technology, Keio University,  
3-14-1 Hiyoshi, Kohoku-ku, Yokohama 223-8522, Japan*

\*Corresponding authors.

Yoshiki Iso – E-mail: iso@applc.keio.ac.jp; Tel.: +81 45 566 1558; Fax: +81 45 566  
1551; orcid.org/0000-0001-7483-2828

Tetsuhiko Isobe – E-mail: isobe@applc.keio.ac.jp; Tel.: +81 45 566 1554; Fax: +81 45  
566 1551; orcid.org/0000-0002-0868-5425

### PG-derived GQDs

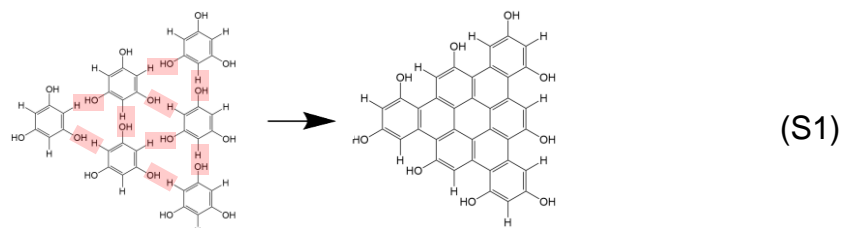

### RS-derived GQDs

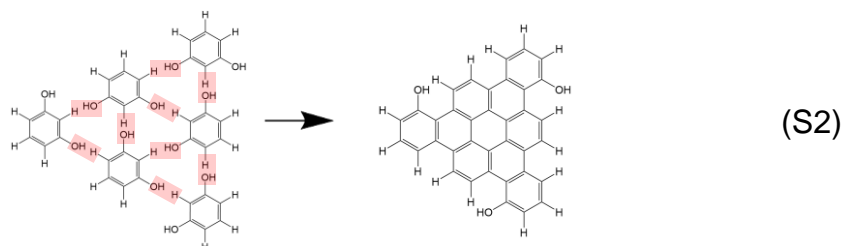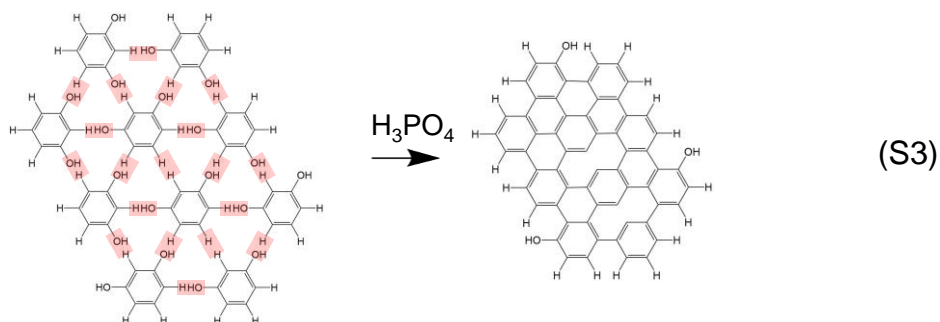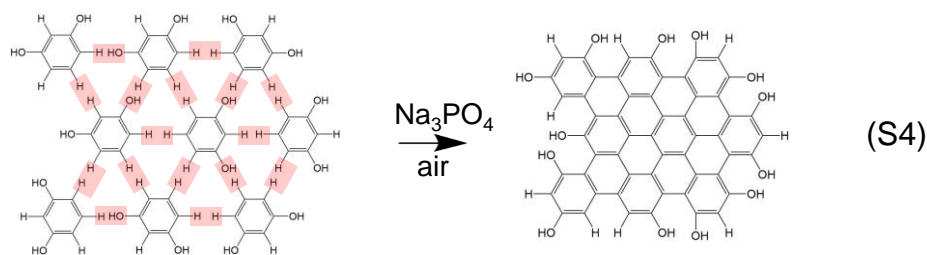

**Fig. S1** Formation of GQDs from PG and RS. The solvothermal reactions (S1) and (S2) in ethanol at 200 °C have been reported by Y. L. Yuan et al.<sup>S1,S2</sup> The reactions (S3) and (S4) in ethylene glycol at 190 °C have been reported by S. Ghosh et al.<sup>S3</sup>

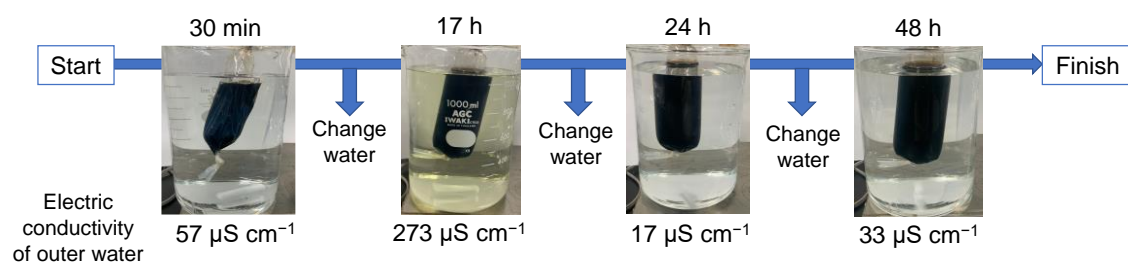

**Fig. S2** Purification of PG-GQDs by dialysis.

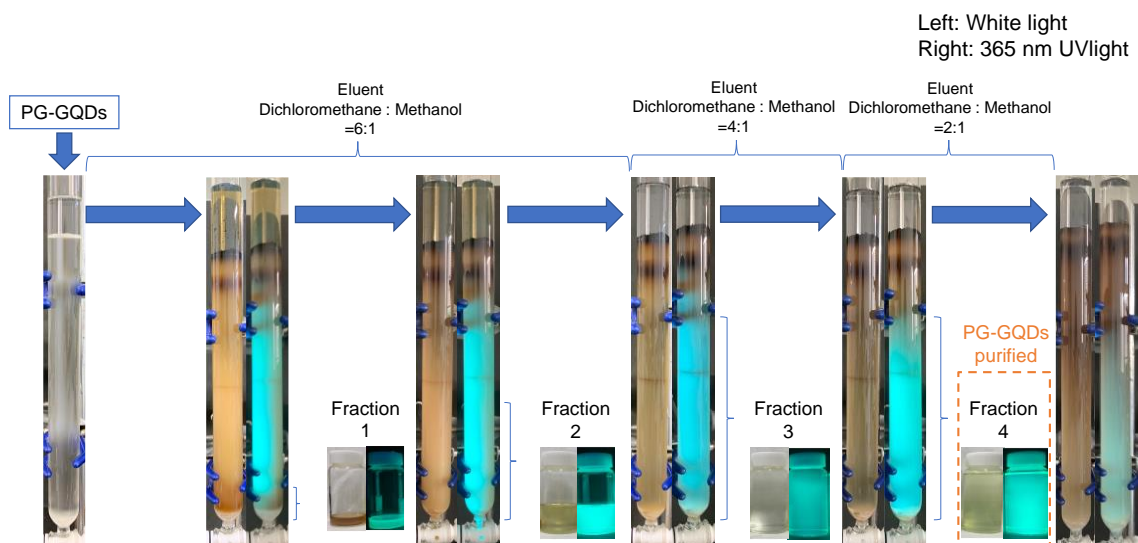

**Fig. S3** Purification of PG-GQDs by silica gel column chromatography.

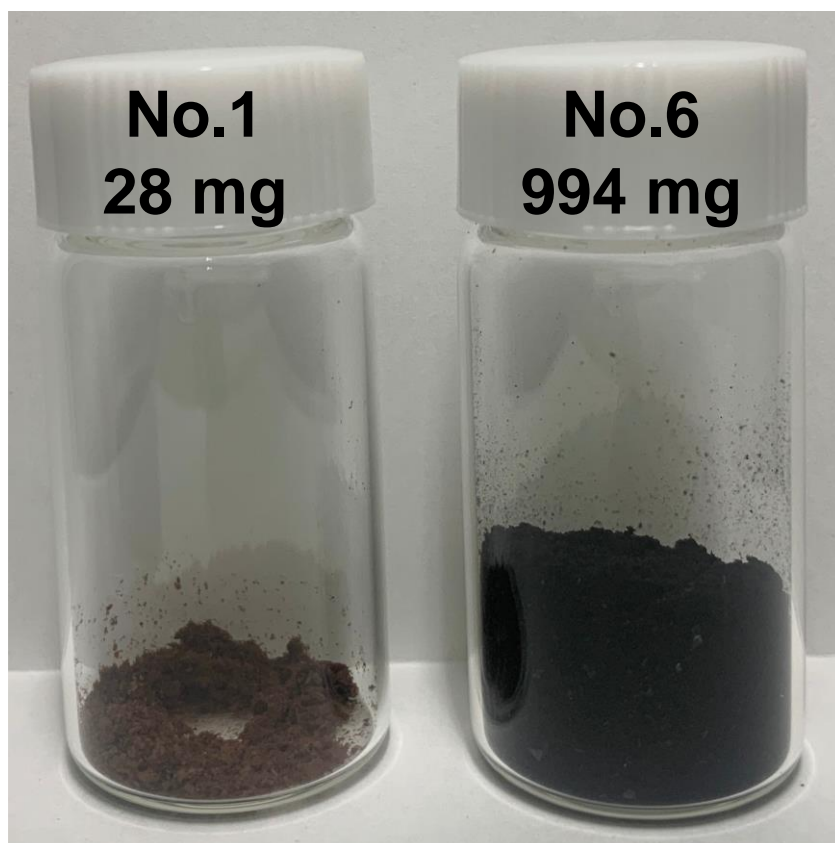

**Fig. S4** Photographs of crude PG-GQDs synthesized under the conditions Nos. 1 and 6.

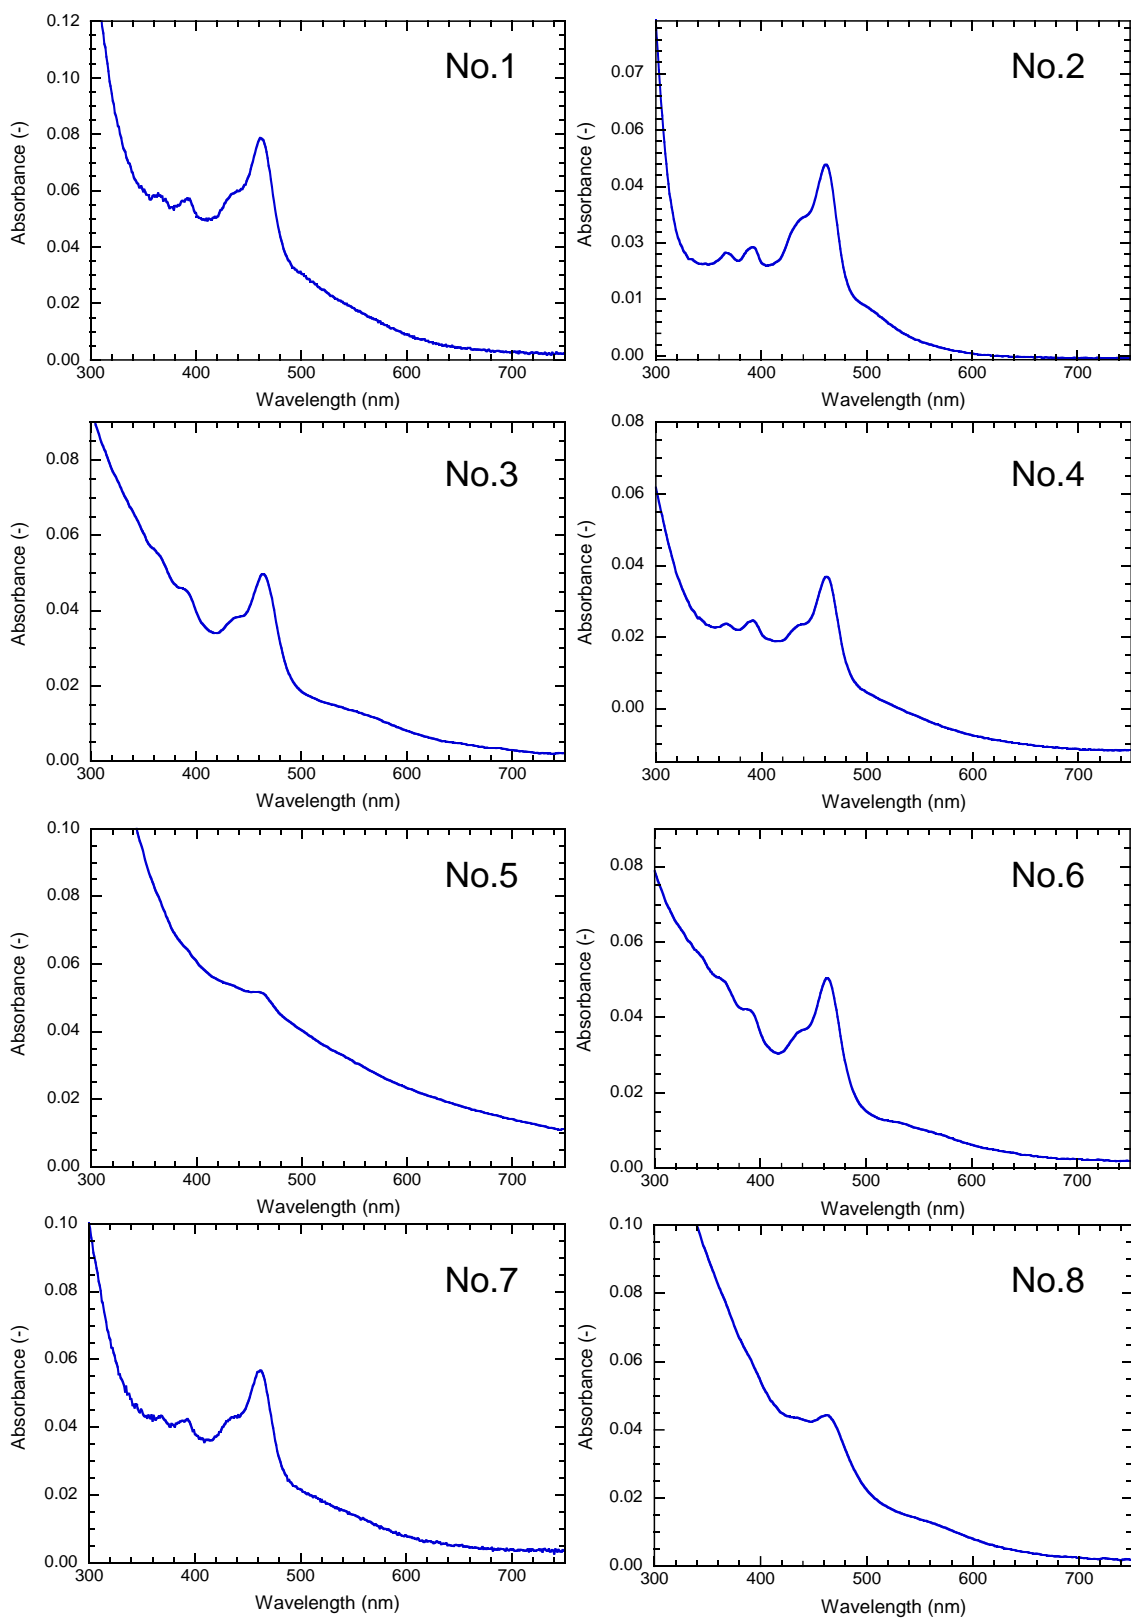

**Fig. S5** UV-vis absorption spectra of crude PG-GQDs in EtOH.

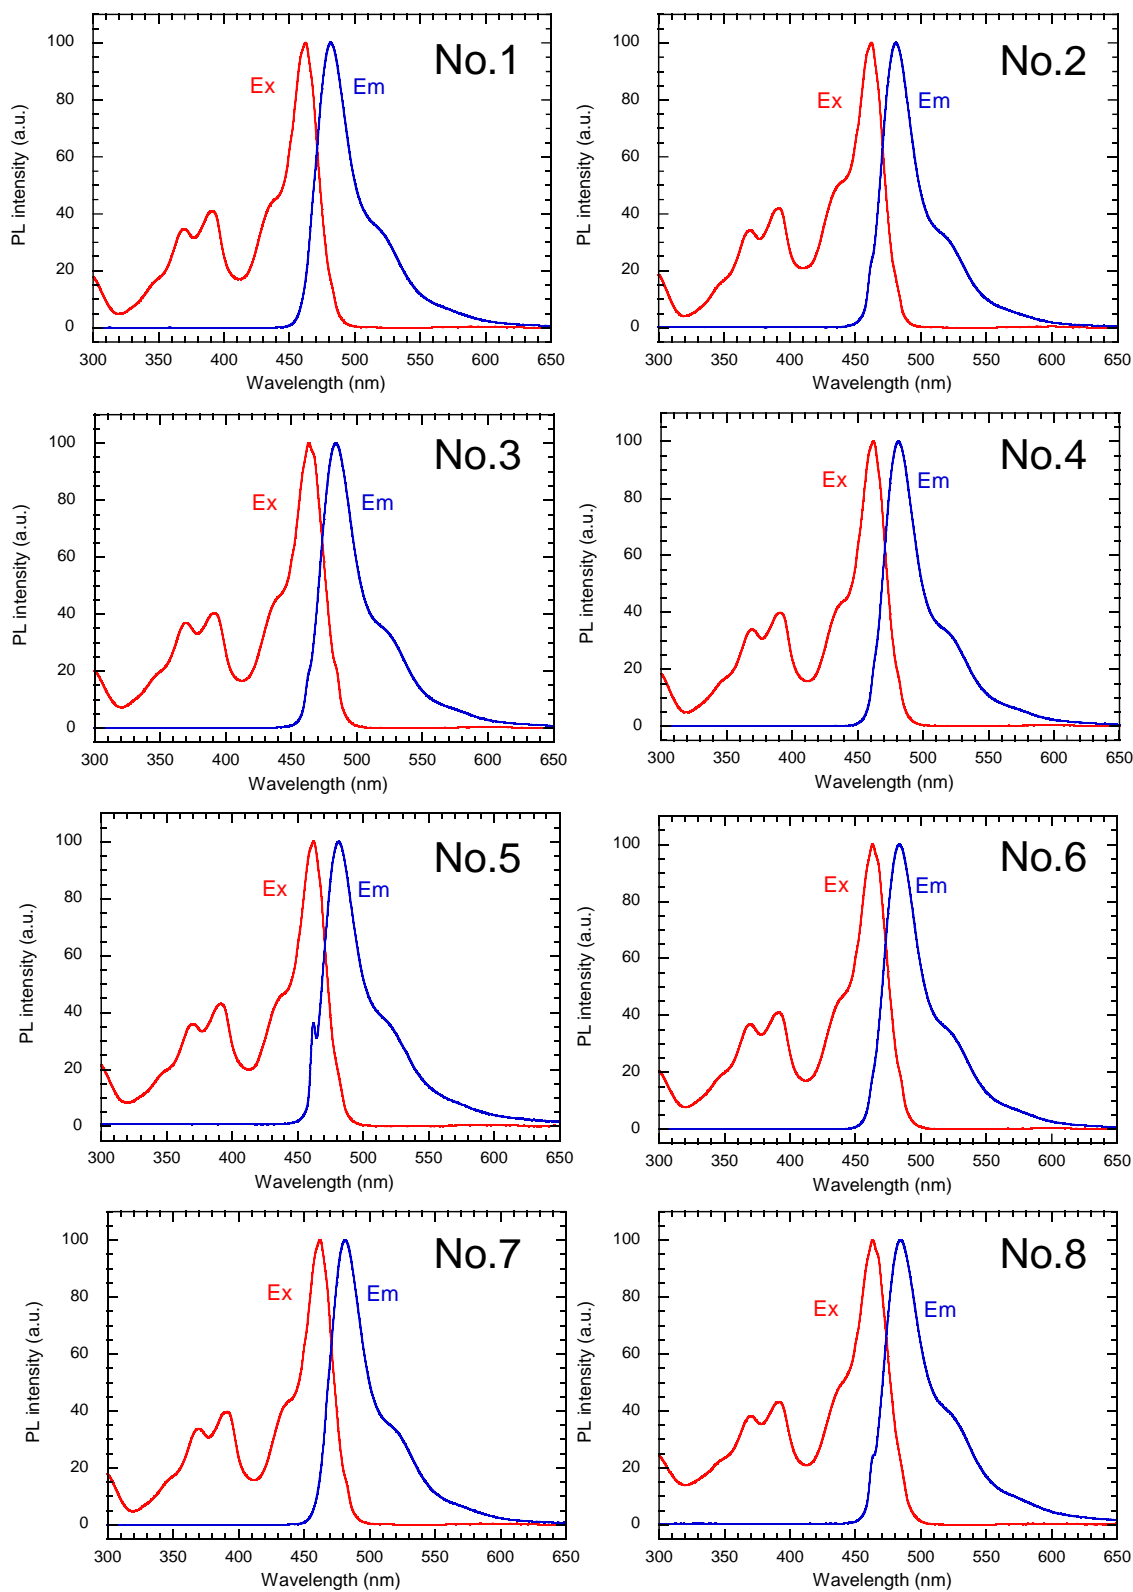

**Fig. S6** PL/PLE spectra of crude PG-GQDs in EtOH.

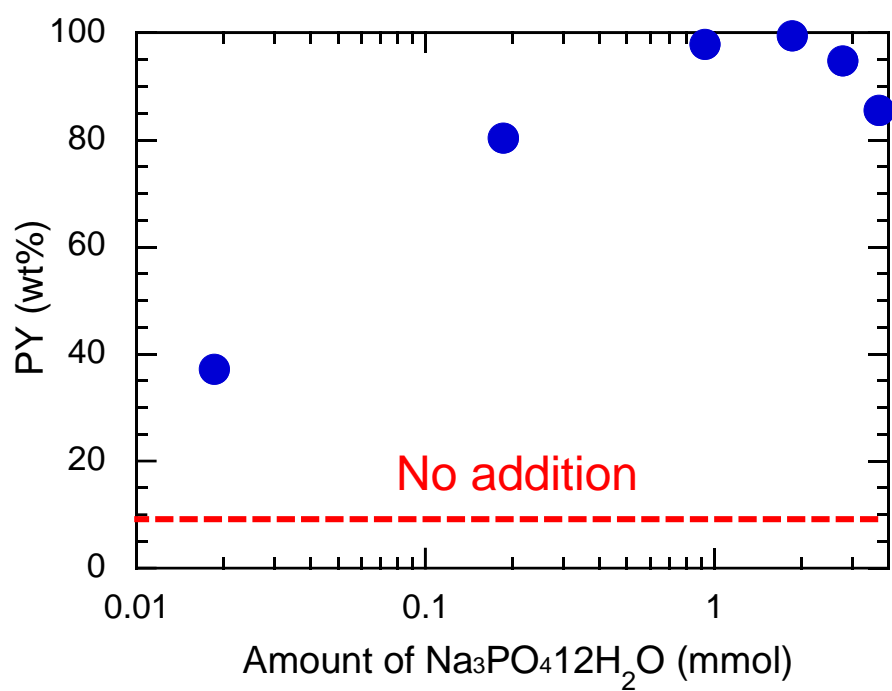

**Fig. S7** Change in PY with amount of  $\text{Na}_3\text{PO}_4 \cdot 12\text{H}_2\text{O}$  catalyst.

**Table S1** Change in PY with amount of  $\text{Na}_3\text{PO}_4 \cdot 12\text{H}_2\text{O}$  catalyst.

| Amount of $\text{Na}_3\text{PO}_4 \cdot 12\text{H}_2\text{O}$ (mmol) | PY (wt%) |
|----------------------------------------------------------------------|----------|
| 0                                                                    | 2.8      |
| 0.0186                                                               | 37.2     |
| 0.186                                                                | 80.3     |
| 0.930                                                                | 97.8     |
| 1.86                                                                 | 99.4     |
| 2.79                                                                 | 94.8     |
| 3.72                                                                 | 85.5     |



**Table S2** PL properties of three different synthesized and purified PG-GQDs ( $\text{Na}_3\text{PO}_4 \cdot 12\text{H}_2\text{O}$ , air) in EtOH.

|         | $\lambda_{\text{ex}}$ (nm) | $\lambda_{\text{em}}$ (nm) | fwhm (nm) | PLQY (%) |
|---------|----------------------------|----------------------------|-----------|----------|
| 1       | 463                        | 483                        | 32        | 72       |
| 2       | 463                        | 484                        | 32        | 80       |
| 3       | 464                        | 485                        | 32        | 73       |
| Average | 463                        | 484                        | 32        | 75       |

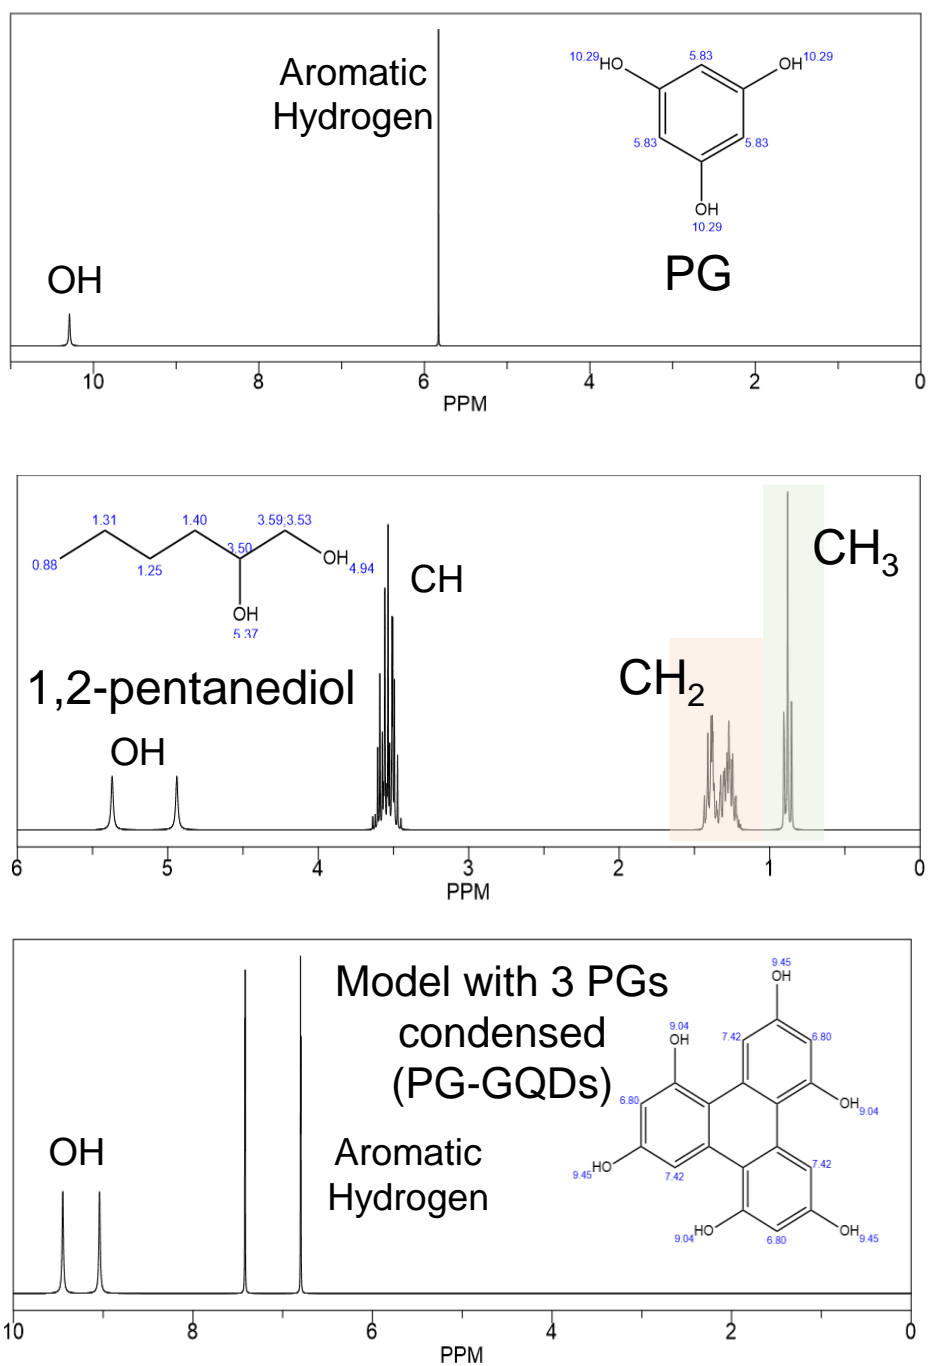

**Fig. S8** Simulated  $^1\text{H-NMR}$  spectra of PG, 1,2-pentanediol, and the molecule formed by dehydration condensation of three PG molecules.

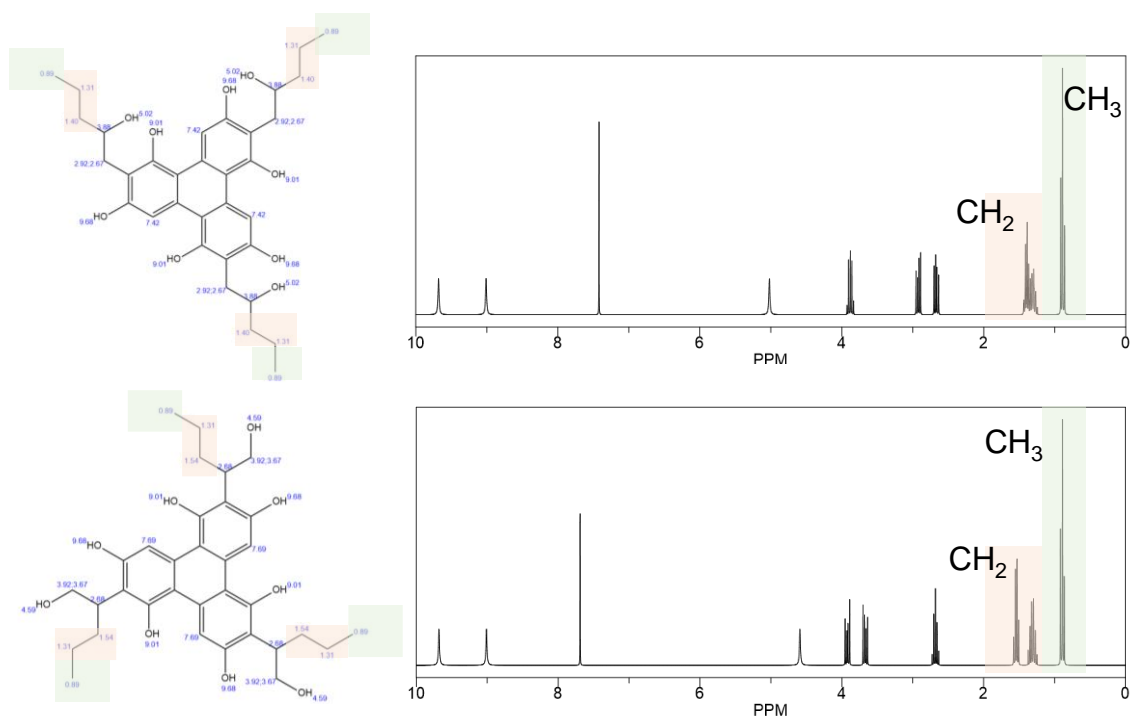

**Fig. S9** Simulated  $^1\text{H-NMR}$  spectra of the dehydration-condensed structure of three PG molecules bonded to three 1,2-pentanediol molecules.

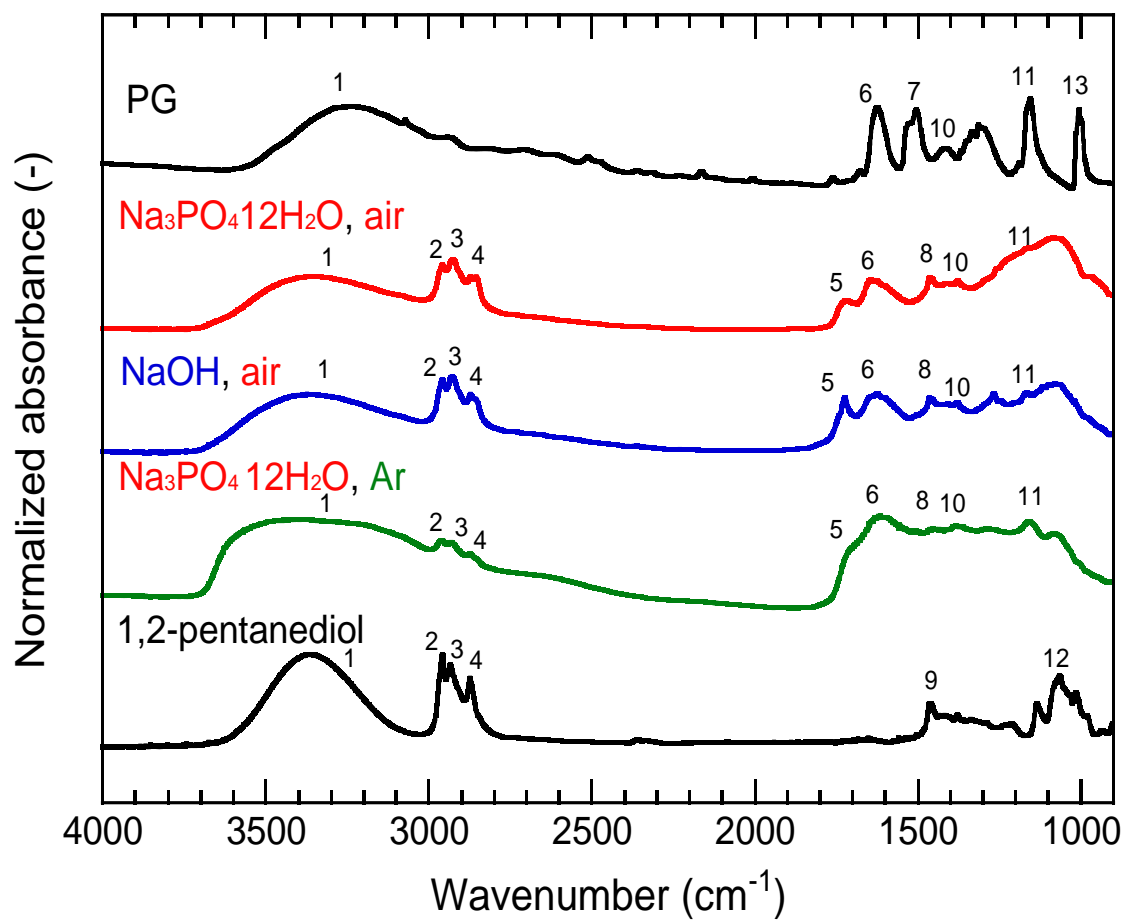

**Fig. S10** FT-IR spectra of PG, purified PG-GQDs, and 1,2-pentanediol.

**Table S3** Assignments of FT-IR absorption peaks shown in Fig. S10.

| Peak | PG            | Wavelength (cm <sup>-1</sup> )                              |           |                                                            |                     | Assignment                         |
|------|---------------|-------------------------------------------------------------|-----------|------------------------------------------------------------|---------------------|------------------------------------|
|      |               | Na <sub>3</sub> PO <sub>4</sub> ·12H <sub>2</sub> O,<br>air | NaOH, air | Na <sub>3</sub> PO <sub>4</sub> ·12H <sub>2</sub> O,<br>Ar | 1,2-<br>pentanediol |                                    |
| 1    | 3100-<br>3600 | v(O-H)                                                      |           |                                                            |                     |                                    |
| 2    |               | 2959                                                        | 2959      | 2960                                                       | 2959                | v <sub>as</sub> (CH <sub>3</sub> ) |
| 3    |               | 2926                                                        | 2929      | 2931                                                       | 2934                | v <sub>s</sub> (CH <sub>3</sub> )  |
| 4    |               | 2873                                                        | 2873      | 2874                                                       | 2873                | v <sub>s</sub> (CH <sub>2</sub> )  |
| 5    |               | 1717                                                        | 1725      | 1704                                                       |                     | v(C=O)                             |
| 6    | 1626          | 1645                                                        | 1626      | 1627                                                       |                     | ring(C=C)<br>ring                  |
| 7    | 1506          |                                                             |           |                                                            |                     | semicircle<br>stretching<br>ring   |
| 8    |               | 1464                                                        | 1466      | 1464                                                       |                     | semicircle<br>stretching           |
| 9    |               |                                                             |           |                                                            | 1466                | δ(CH <sub>2</sub> )                |
| 10   | 1415          | 1410                                                        | 1409      | 1408                                                       |                     | δ(O-H)                             |
| 11   | 1156          | 1162                                                        | 1166      | 1160                                                       |                     | v(C-O)                             |
| 12   |               |                                                             |           |                                                            | 1066                | v <sub>as</sub> (C-C-O)            |
| 13   | 1008          |                                                             |           |                                                            |                     | δ(C-H)                             |

v=stretching, δ=deformation or bending, as=asymmetric, s=symmetric

PG-GQDs

RS-GQDs

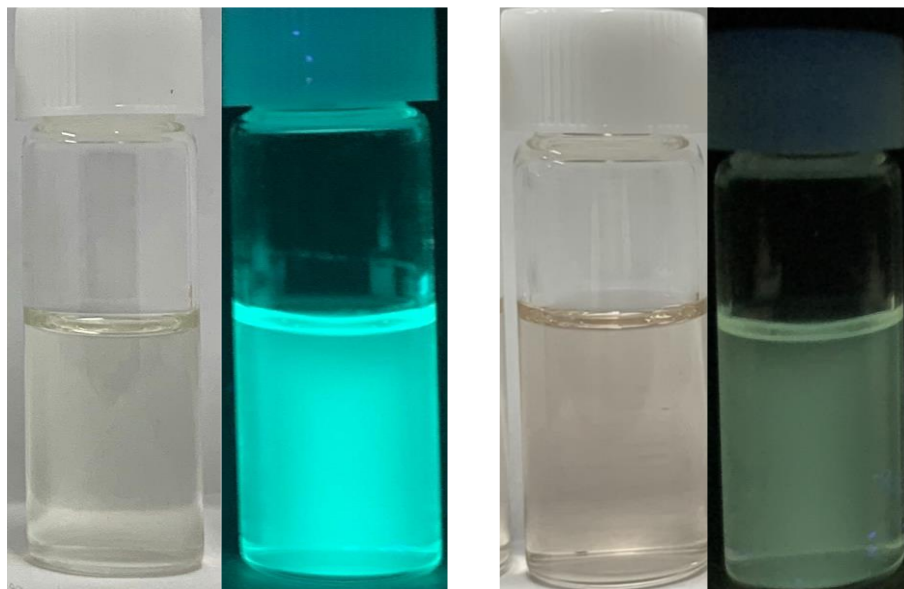

**Fig. S11** Photographs of purified PG-GQDs and RS-GQDs in EtOH under white light and 365 nm UV light.

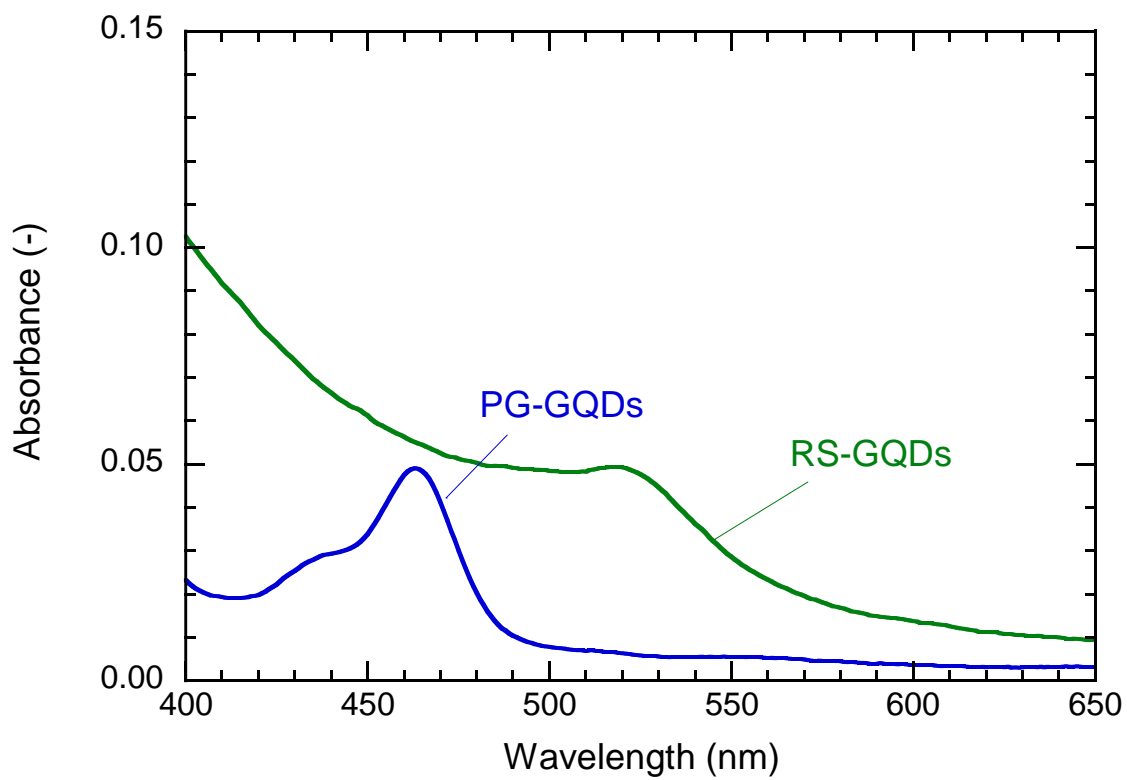

**Fig. S12** UV-vis absorption spectra of purified PG-GQDs and RS-GQDs in EtOH.

**Table S4** Optical properties of purified PG-GQDs and RS-GQDs in EtOH.

|         | Absorption<br>wavelength<br>(nm) | Excitation<br>wavelength (nm) | Emission<br>wavelength (nm) | fwhm<br>(nm) | PLQY<br>(%) |
|---------|----------------------------------|-------------------------------|-----------------------------|--------------|-------------|
| PG-GQDs | 463                              | 463                           | 483                         | 32           | 75          |
| RS-GQDs | 518                              | 524                           | 542                         | 40           | 13          |



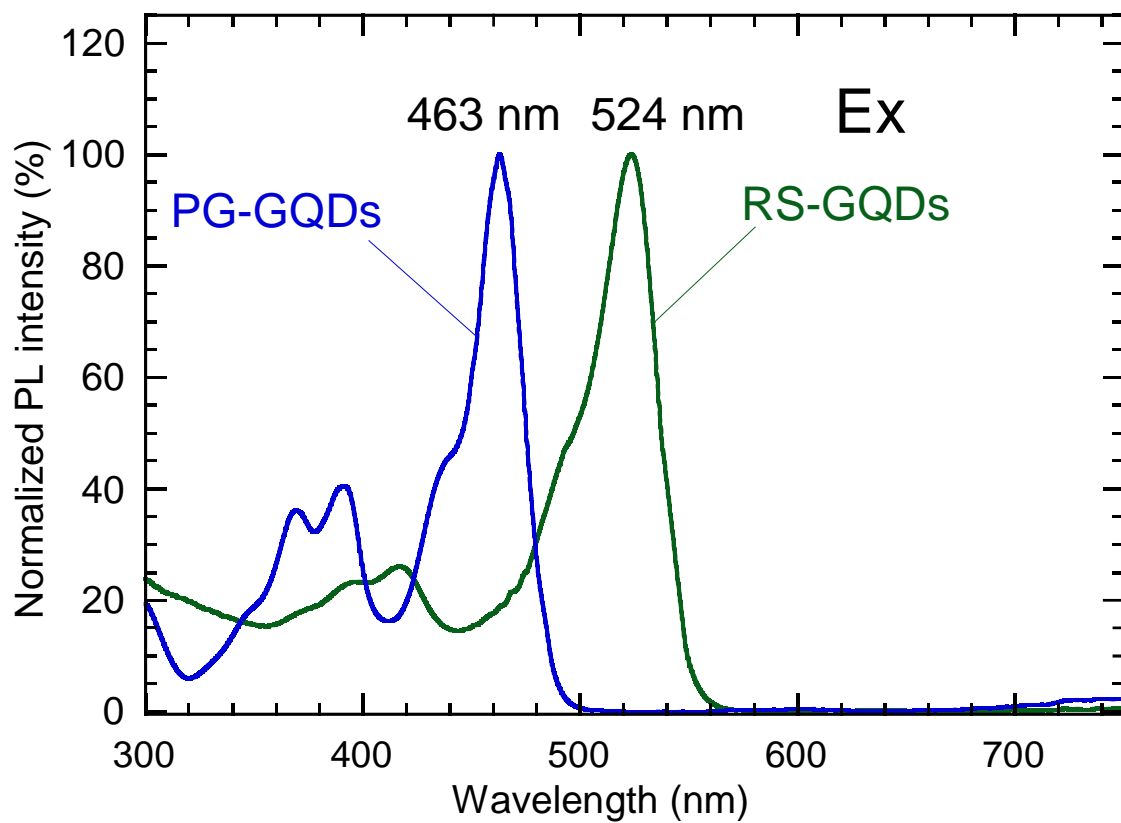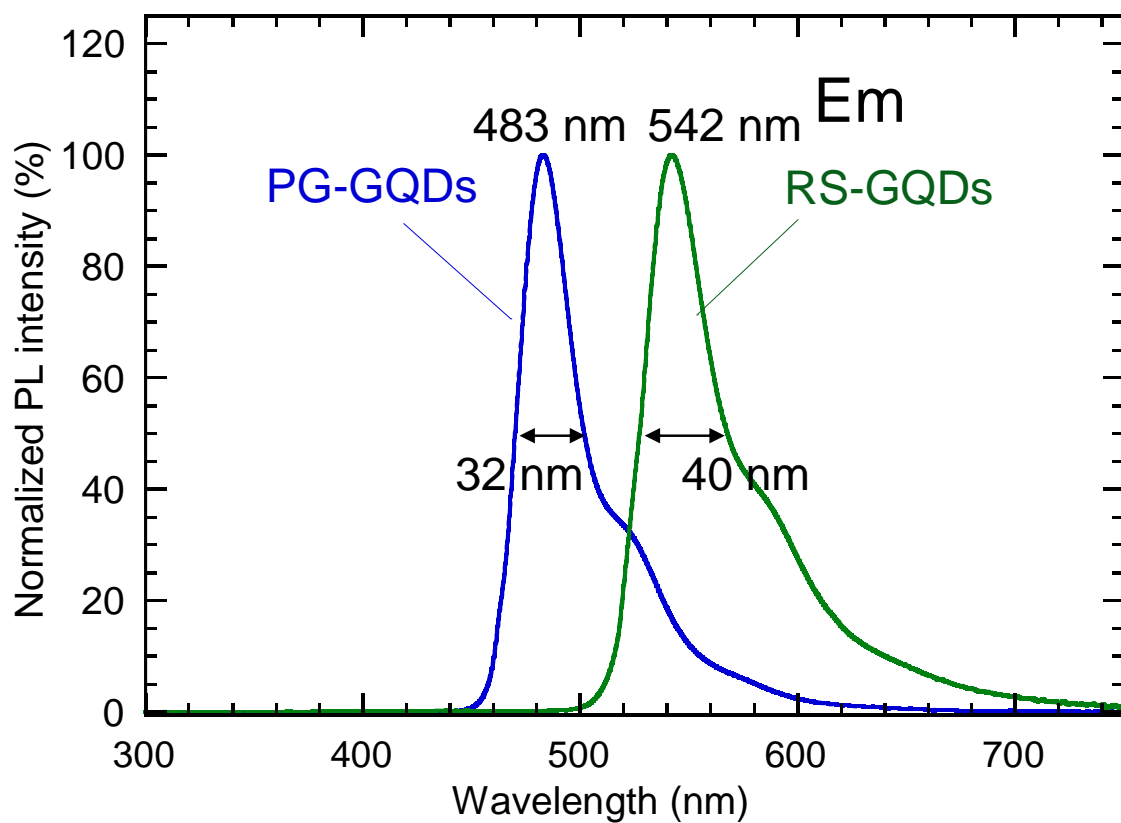

**Fig. S13** PL/PLE spectra of purified PG-GQDs and RS-GQDs in EtOH.

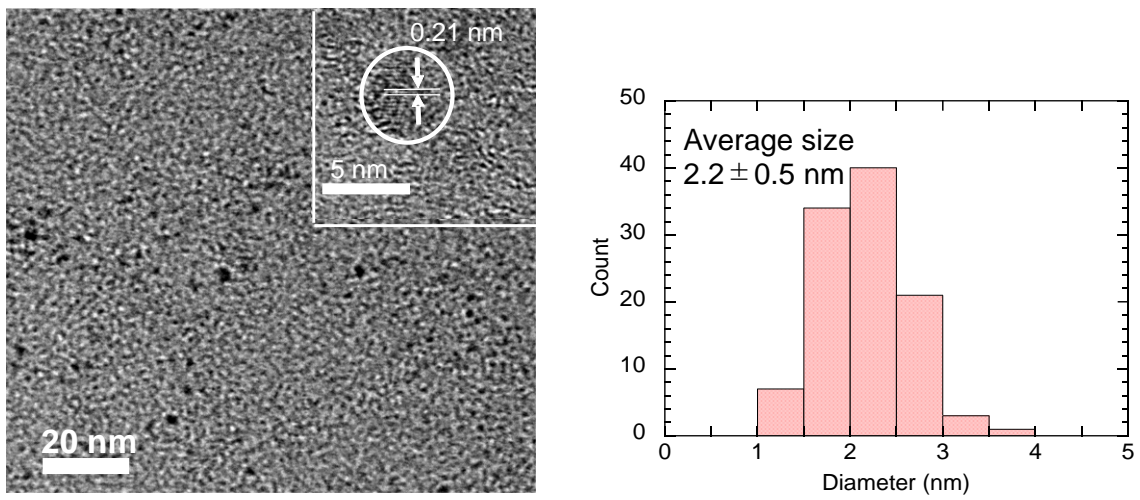

**Fig. S14** FE-TEM images of RS-GQDs and their size distribution.

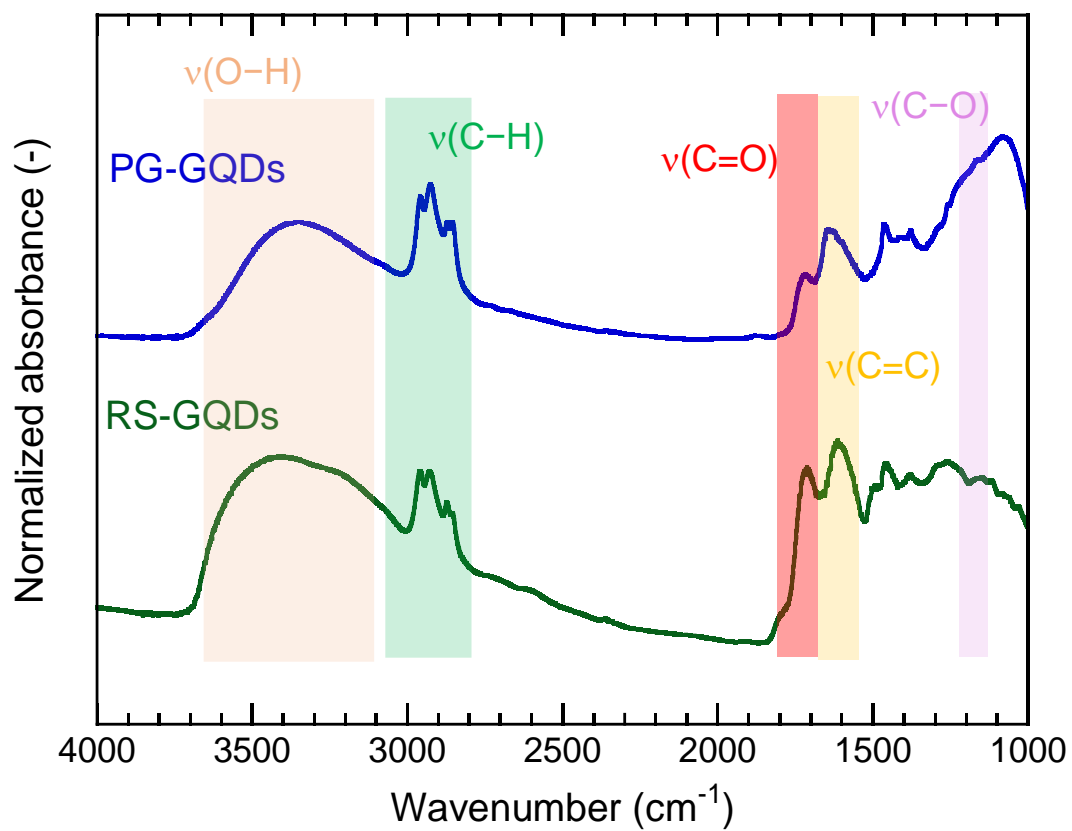

**Fig. S15** FT-IR spectra of purified PG-GQDs and RS-GQDs.

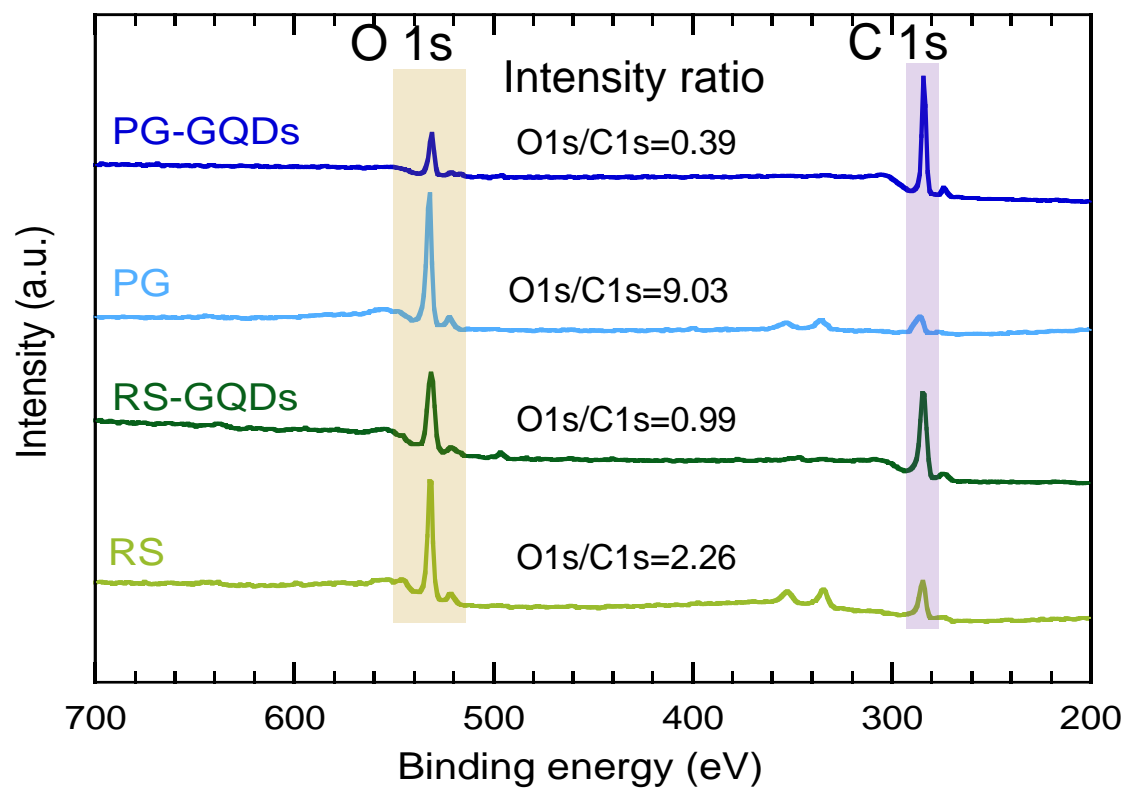

**Fig. S16** Wide scan XPS spectra of PG, PG-GQDs, RS, and RS-GQDs.

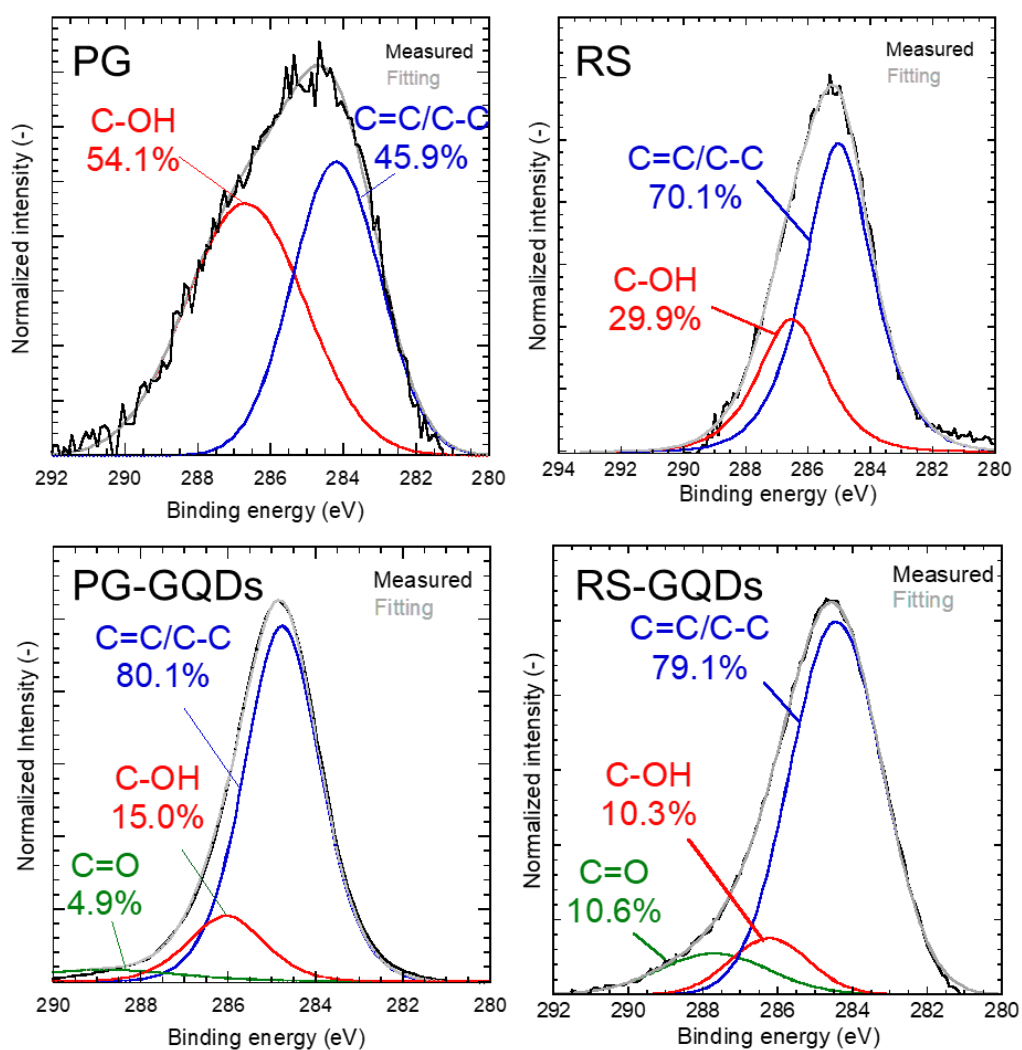

**Fig. S17** Narrow scan C 1s XPS spectra of PG, PG-GQDs, RS, and RS-GQDs.

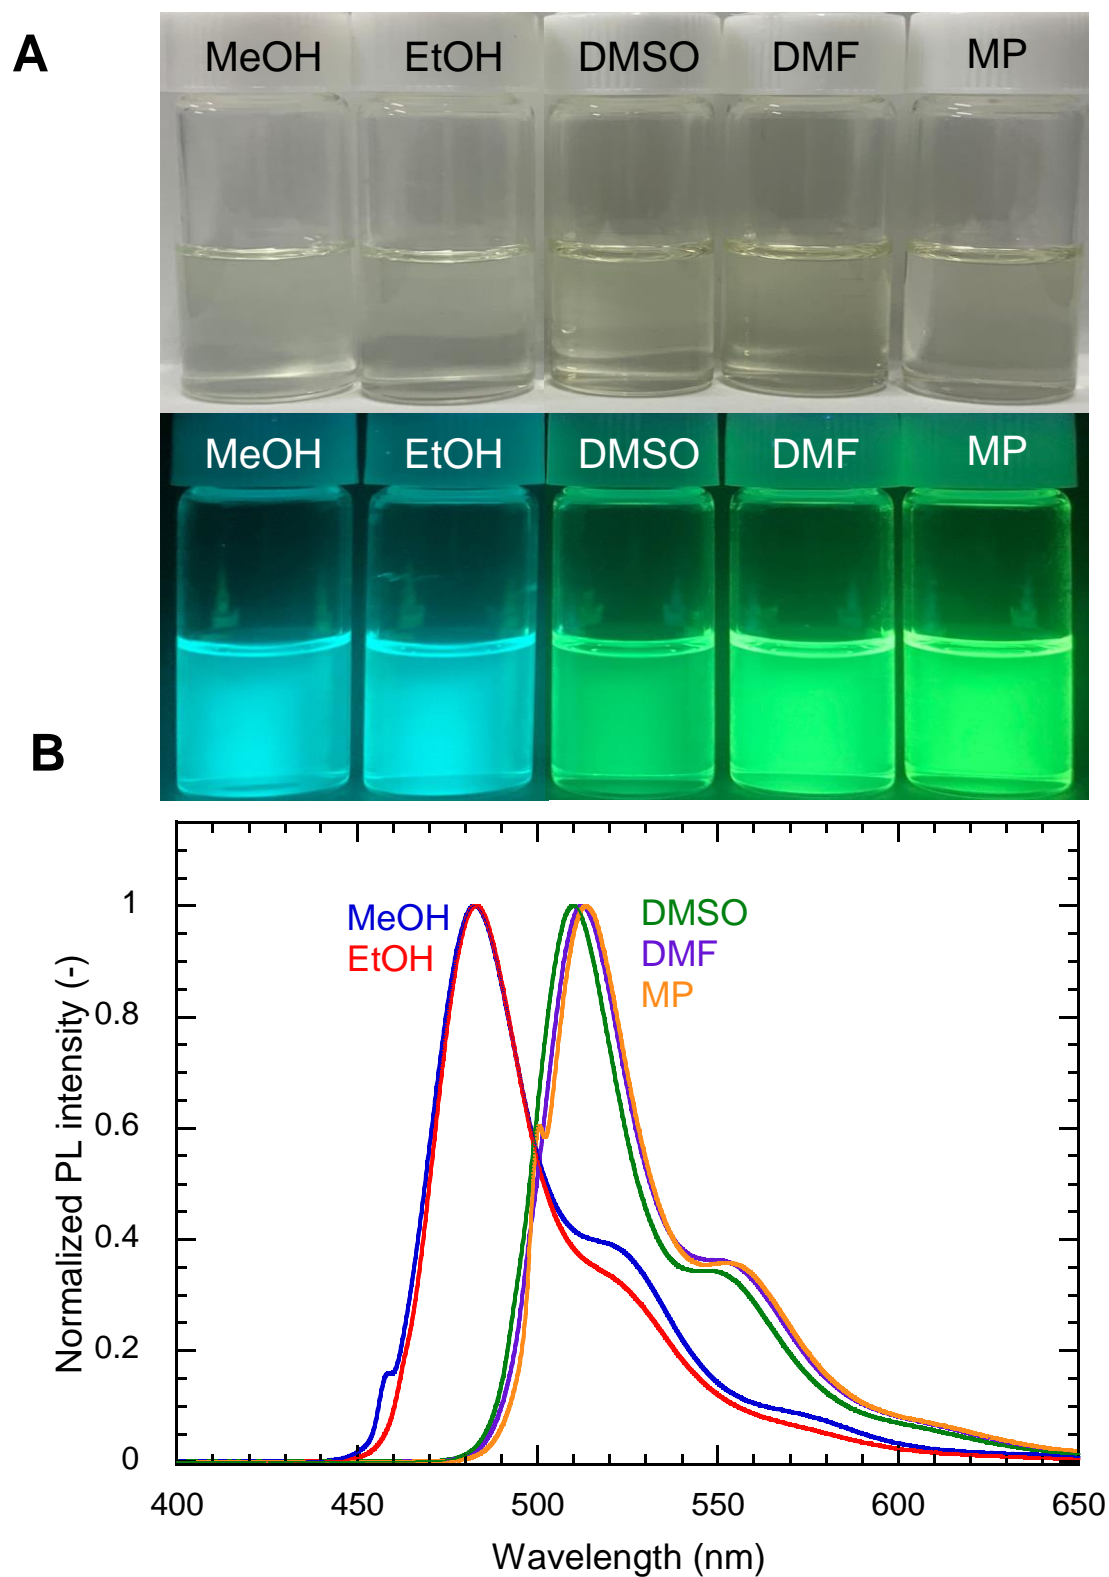

**Fig. S18** (A) Photographs of purified PG-GQDs in solvents with different polarities under white light and 365 nm UV light and (B) their PL spectra.

**Table S5** PL properties of purified PG-GQDs in solvents with different polarities.

| Dispersion    | $E_T(30)$<br>(kcal mol <sup>-1</sup> ) | $\lambda_{ex}$ (nm) | $\lambda_{em}$ (nm) | fwhm (nm) | PLQY (%) |
|---------------|----------------------------------------|---------------------|---------------------|-----------|----------|
| MP            | 42.2                                   | 500                 | 514                 | 33        | 96       |
| DMF           | 43.2                                   | 498                 | 513                 | 32        | 94       |
| DMSO          | 45.1                                   | 494                 | 511                 | 30        | 79       |
| EtOH          | 51.9                                   | 463                 | 484                 | 32        | 80       |
| MeOH          | 55.4                                   | 458                 | 483                 | 34        | 97       |
| Water (pH 7)  |                                        | 444                 | 474                 | 50        | 6        |
| Water (pH 9)  |                                        | 428                 | 465                 | 50        | 30       |
| Water (pH 11) | 63.1                                   | 428                 | 465                 | 49        | 60       |
| Water (pH 13) |                                        | 428                 | 466                 | 49        | 52       |

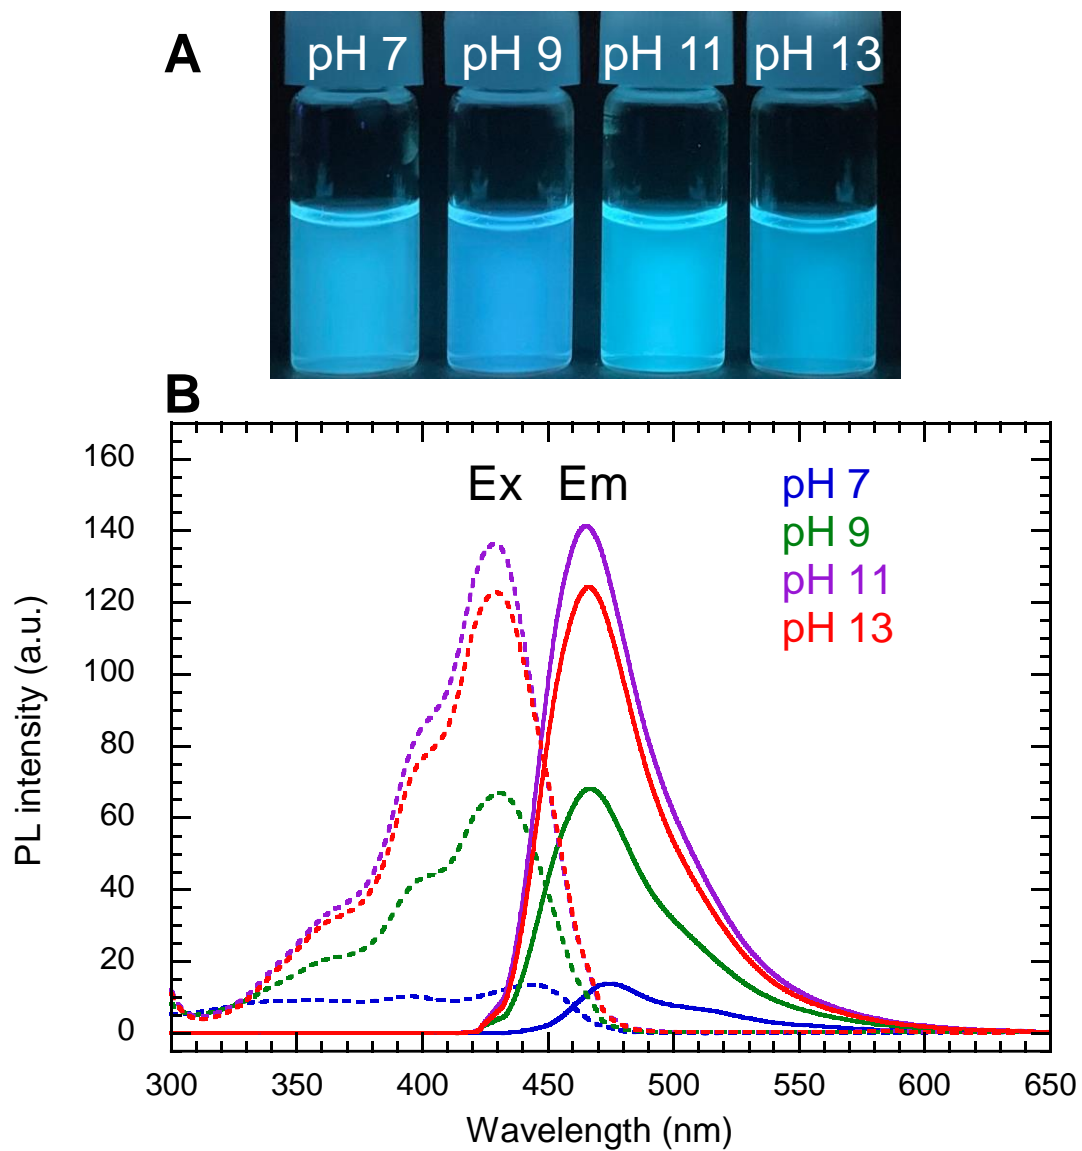

**Fig. S19** (A) Photographs of purified PG-GQDs in water at different pH and (B) their PL/PLE spectra.



## References

- S1 F. L. Yuan, T. Yuan, L. Z. Sui, Z. B. Wang, Z. F. Xi, Y. C. Li, X. H. Li, L. Z. Fan, Z. A. Tan and A. M. Chen, *Nat. Commun.*, 2018, **9**, 2249.
- S2 F. L. Yuan, P. He, Z. F. Xi, X. H. Li, Y. C. Li, H. Z. Zhong, L. Z. Fan and S. H. Yang, *Nano Res.*, 2019, **12**, 1669–1674.
- S3 S. Ghosh, H. Ali and N. R. Jana, *ACS Sustainable Chem. Eng.*, 2019, **7**, 12629–12637.
